# Supplementary material for: Revising the human mutation rate: implications for understanding human evolution
Source: Springer Nature journal article supplement (doi:10.1038/nrg3295), 2012-09-11
Supplement: 41576_2012_BFnrg3295_MOESM3_ESM.pdf [file 41576_2012_BFnrg3295_MOESM3_ESM.pdf]

## Revising the human mutation rate: implications for understanding human evolution

### Supplementary information

Aylwyn Scally and Richard Durbin  
Wellcome Trust Sanger Institute, Hinxton, UK

#### Supplementary Table: Measurements of the *de novo* mutation rate in modern humans

The table below shows published per-generation mean mutation rate estimates with 95% confidence intervals (where reported) in studies of *de novo* mutations in modern humans, with corresponding yearly mutation rates assuming 30 year and 25 year mean generation times. The loci considered in each case depended on study methodology: either mutations at selected dominant or X-linked disease genes (disease), whole genome sequencing (WG), or exome sequencing (exome). Some variation in estimated rate is expected to be associated with this factor, in particular an expectation of higher mutation rate around coding regions, which are GC rich (Box 2; Sanders et al. 2012).

The exome sequencing studies of Sanders et al. (2012) and O’Roak et al. (2012) reported mutation rates for individuals affected by autism spectrum disorder (ASD) as well as for unaffected siblings; the latter are quoted here. *De novo* rates for ASD-affected individuals were found to be higher in these studies than in their siblings, in particular at non-synonymous sites.

Two estimates were made by the 1000 Genomes Project, one from sequencing of a trio with European ancestry (CEU) and one from a trio with Yoruba (African) ancestry (YRI).

| study                            | loci considered | per-generation mean mutation rate ( $10^{-8}$ bp <sup>-1</sup> generation <sup>-1</sup> ) | yearly mean mutation rate ( $10^{-9}$ bp <sup>-1</sup> y <sup>-1</sup> ) |                         |
|----------------------------------|-----------------|-------------------------------------------------------------------------------------------|--------------------------------------------------------------------------|-------------------------|
|                                  |                 |                                                                                           | $t_{\text{gen}} = 30$ y                                                  | $t_{\text{gen}} = 25$ y |
| Kondrashov (2003)                | disease         | 1.85 (0.00–3.65)                                                                          | 0.62 (0.00–1.22)                                                         | 0.74 (0.00–1.46)        |
| Lynch (2010)                     | disease         | 1.28 (0.68–1.88)                                                                          | 0.42 (0.23–0.63)                                                         | 0.51 (0.27–0.75)        |
| Roach <i>et al.</i> (2010)       | WG              | 1.10 (0.68–1.70)                                                                          | 0.37 (0.23–0.57)                                                         | 0.44 (0.27–0.68)        |
| Awadalla <i>et al.</i> (2010)    | WG              | 1.36 (0.34–2.72)                                                                          | 0.45 (0.11–0.91)                                                         | 0.54 (0.14–1.09)        |
| 1000 Genomes Project (2010), CEU | WG              | 1.17 (0.94–1.73)                                                                          | 0.39 (0.31–0.57)                                                         | 0.47 (0.38–0.69)        |
| 1000 Genomes Project (2010), YRI | WG              | 0.97 (0.72–1.44)                                                                          | 0.32 (0.24–0.48)                                                         | 0.39 (0.29–0.58)        |
| Sanders <i>et al.</i> (2012)     | exome           | 1.28 (1.05–1.50)                                                                          | 0.43 (0.35–0.50)                                                         | 0.51 (0.42–0.60)        |
| O’Roak <i>et al.</i> (2012)      | exome           | 1.57 (1.05–2.26)                                                                          | 0.52 (0.35–0.75)                                                         | 0.63 (0.42–0.90)        |
| Kong <i>et al.</i> (2012)        | WG              | 1.20                                                                                      | 0.40                                                                     | 0.48                    |

#### References

- 1000 Genomes Project Consortium (2010). ‘A map of human genome variation from population-scale sequencing.’ *Nature* **467**, 1061–1073.
- Awadalla, P., J. *et al.* (2010). ‘Direct measure of the *de novo* mutation rate in autism and schizophrenia cohorts’. *American journal of human genetics*. **87**, 316–324.
- Kondrashov, A. S. (2003). ‘Direct estimates of human per nucleotide mutation rates at 20 loci causing mendelian diseases’. *Hum. Mutat.* **21**, 12–27.
- Kong, A., *et al.* (2012). ‘Rate of *de novo* mutations and the importance of father’s age to disease risk’. *Nature* **488**, 471–475.
- Lynch, M. (2010). ‘Rate, molecular spectrum, and consequences of human mutation’. *Proceedings of the National Academy of Sciences* **107**, 961–968.
- O’Roak, B. J., *et al.* (2012). ‘Sporadic autism exomes reveal a highly interconnected protein network of *de novo* mutations’. *Nature*, **485**, 246–250.

- Roach, J. C., *et al.* (2010). 'Analysis of genetic inheritance in a family quartet by Whole-Genome sequencing'. *Science* **328**, 636-639.
- Sanders, S. J., *et al.* (2012). 'De novo mutations revealed by whole-exome sequencing are strongly associated with autism'. *Nature*, **485**, 237–241.
